# Supplementary material for: Quality of dietary fat and genetic risk of type 2 diabetes: individual participant data meta-analysis
Source: PubMed Central journal article supplement — BMJ. 2019 Jul 25;366:l4292. doi: 10.1136/bmj.l4292 (PMC6652797; doi:10.1136/bmj.l4292), 2019-07-25
Supplement: merj043363.ww2.pdf [file merj043363.ww2.pdf]

Authors:

Jordi Merino, *postdoctoral research fellow*<sup>1,2,3\*</sup>, Marta Guasch-Ferré, *postdoctoral research fellow*<sup>4\*</sup>, Christina Ellervik, *associate professor*<sup>5,6\*</sup>, Hassan S. Dashti, *postdoctoral research fellow*<sup>1,2\*</sup>, Stephen J. Sharp, *senior statistician*<sup>7</sup>, Peitao Wu, *doctoral researcher*<sup>8</sup>, Kim Overvad, *professor*<sup>9,10</sup>, Chloé Sarnowski, *postdoctoral research fellow*<sup>8</sup>, Mikko Kuokkanen, *postdoctoral research fellow*<sup>11,12</sup>, Rozenn N. Lemaitre, *associate professor*<sup>13</sup>, Anne E. Justice, *assistant professor*<sup>14,15</sup>, Ulrika Ericson, *associate professor*<sup>16</sup>, Kim V.E. Braun, *postdoctoral research fellow*<sup>17</sup>, Yuvaraj Mahendran, *postdoctoral research fellow*<sup>18,19</sup>, Alexis C. Frazier-Wood, *associate professor*<sup>20</sup>, Dianjianyi Sun, *postdoctoral research fellow*<sup>21</sup>, Audrey Y. Chu, *research fellow*<sup>22</sup>, Toshiko Tanaka, *staff scientist*<sup>23</sup>, Jian'an Luan, *senior statistician*<sup>7</sup>, Jaeyoung Hong, *postdoctoral research fellow*<sup>8</sup>, Anne Tjønneland, *professor*<sup>24</sup>, Ming Ding, *research fellow*<sup>4</sup>, Annamari Lundqvist, *adjunct professor*<sup>11</sup>, Kenneth Mukamal, *associate professor*<sup>25</sup>, Rebecca Rohde, *doctoral researcher*<sup>15</sup>, Christina-Alexandra Schulz, *doctoral researcher*<sup>16</sup>, Oscar H. Franco, *professor*<sup>17</sup>, Niels Grarup, *associate professor*<sup>18</sup>, Yii-Der Ida Chen, *research fellow*<sup>26</sup>, Lydia Bazzano, *associate professor*<sup>21</sup>, Paul W. Franks, *professor*<sup>4,27,28,29</sup>, Julie E. Buring, *professor*<sup>30</sup>, Claudia Langenberg, *group leader*<sup>7</sup>, Ching-Ti Liu, *associate professor*<sup>8</sup>, Torben Hansen, *professor*<sup>18</sup>, Majken K. Jensen, *associate professor*<sup>4,31</sup>, Katri Sääksjärvi, *research fellow*<sup>11</sup>, Bruce M. Psaty, *professor*<sup>13</sup>, Kristin L. Young, *research assistant professor*<sup>15</sup>, George Hindy, *postdoctoral research fellow*<sup>1,2,16</sup>, Camilla Helene Sandholt, *research fellow*<sup>18</sup>, Paul M. Ridker, *professor*<sup>30,32</sup>, Jose M. Ordovas, *professor*<sup>33,34,35</sup>, James B. Meigs, *professor*<sup>36,37</sup>, Oluf Pedersen, *professor*<sup>18</sup>, Peter Kraft, *professor*<sup>38,39</sup>, Markus Perola, *professor*<sup>11,12,40</sup>, Kari E. North, *professor*<sup>15</sup>, Marju Orho-Melander, *professor*<sup>16</sup>, Trudy Voortman, *research fellow*<sup>17</sup>, Ulla Toft, *associate professor*<sup>41,42</sup>, Jerome I. Rotter, *professor*<sup>26</sup>, Lu Qi, *professor*<sup>4,21,31</sup>, Nita G. Forouhi, *professor*<sup>7</sup>, Dariush Mozaffarian, *professor*<sup>43</sup>, Thorkild I.A. Sørensen, *professor*<sup>18,44</sup>, Meir J. Stampfer, *professor*<sup>4,31,38</sup>, Satu Männistö, *research fellow*<sup>11</sup>, Elizabeth Selvin, *professor*<sup>45</sup>, Fumiaki Imamura, *senior investigator scientist*<sup>7</sup>, Veikko Salomaa, *professor*<sup>11</sup>, Frank B. Hu, *professor*<sup>4,31</sup>, Nick J. Wareham, MBBS, *professor*<sup>7</sup>,

Josée Dupuis, *professor*<sup>8,46</sup>, Caren E. Smith, *research scientist*<sup>33#</sup>, Tuomas O. Kilpeläinen, *associate professor*<sup>18#</sup>, Daniel I. Chasman, *associate professor*<sup>#2,30,47</sup> Jose C. Florez, *professor*<sup>1,2,3,37#</sup>

<sup>1</sup> Center for Genomic Medicine, Massachusetts General Hospital, Boston, MA, USA

<sup>2</sup> Programs in Metabolism and Medical & Population Genetics, Broad Institute of MIT and Harvard, Cambridge, MA, USA

<sup>3</sup> Diabetes Unit, Massachusetts General Hospital, Boston, MA, USA

<sup>4</sup> Department of Nutrition, Harvard T.H. Chan School of Public Health, Boston, MA, USA

<sup>5</sup> Department of Laboratory Medicine, Boston Children's Hospital, Boston, MA, USA

<sup>6</sup> Department of Pathology, Harvard Medical School, Boston, USA

<sup>7</sup> Medical Research Council (MRC) Epidemiology Unit, University of Cambridge, Cambridge, UK

<sup>8</sup> Department of Biostatistics, Boston University School of Public Health, Boston, MA, USA

<sup>9</sup> Department of Public Health, Section for Epidemiology, Aarhus University, Aarhus, Denmark

<sup>10</sup> Department of Cardiology, Aalborg University Hospital, Denmark

<sup>11</sup> Department of Public Health Solutions, National Institute for Health and Welfare, Helsinki, Finland

<sup>12</sup> Diabetes and Obesity Research Program, Institute for Molecular Medicine, University of Helsinki, Finland

<sup>13</sup> Cardiovascular Health Research Unit, Departments of Medicine, Epidemiology, and Health Service, University of Washington, Seattle, WA; Kaiser Permanente Washington Health Research Institute, Seattle, WA, USA

<sup>14</sup> Biomedical and Translational Informatics Institute, Geisinger Health Weis Center for Research, Danville, PA, USA

<sup>15</sup> Department of Epidemiology, University of North Carolina at Chapel Hill, Chapel Hill, NC, USA

<sup>16</sup> Department of Clinical Sciences, Skåne University Hospital in Malmö, Clinical Research Center, Lund University, Malmö, Sweden

<sup>17</sup> Department of Epidemiology, Erasmus MC University Hospital, Rotterdam, The Netherlands

<sup>18</sup> Novo Nordisk Foundation Center for Basic Metabolic Research, Section of Metabolic Genetics, Faculty of Health and Medical Sciences, University of Copenhagen, Copenhagen, Denmark

<sup>19</sup> The Danish Diabetes Academy, Odense, Denmark

<sup>20</sup> USDA/ARS Children's Nutrition Research Center, Houston, TX, USA

<sup>21</sup> Department of Epidemiology, School of Public Health and Tropical Medicine, Tulane University, New Orleans, LA, USA

<sup>22</sup> Division of Preventive Medicine, Brigham and Women's Hospital, Boston, MA, USA

<sup>23</sup> Translational Gerontology Branch, National Institute on Aging, Baltimore, MD, USA

<sup>24</sup> Unit of Diet, Genes and Environment, Danish Cancer Society Research Center, Copenhagen, Denmark

<sup>25</sup> Department of Medicine, Beth Israel Deaconess Medical Center, Boston, MA, USA

<sup>26</sup> The Institute for Translational Genomics and Population Sciences, Department of Pediatrics, Los Angeles Biomedical Research Institute at Harbor-UCLA Medical Center, Torrance, CA, USA

<sup>27</sup> Department of Clinical Sciences, Genetic & Molecular Epidemiology Unit, Lund University Diabetes Centre, Skåne University Hospital, Malmö, Sweden.

<sup>28</sup> Department of Public Health and Clinical Medicine, Unit of Medicine, Umeå University, Umeå, Sweden.

<sup>29</sup> Oxford Centre for Diabetes, Endocrinology & Metabolism, Radcliff Department of Medicine, University of Oxford, Oxford, United Kingdom

<sup>30</sup> Division of Preventive Medicine, Brigham and Women's Hospital and Harvard Medical School, Boston, MA, USA

<sup>31</sup> Channing Division of Network Medicine, Brigham and Women's Hospital, Harvard Medical School, Boston, MA, USA

<sup>32</sup> Division of Cardiovascular Medicine, Brigham and Women's Hospital and Harvard Medical School, Boston, MA, USA

<sup>33</sup> Nutrition and Genomics Laboratory, Jean Mayer USDA Human Nutrition Research Center on Aging, Tufts University, Boston, MA, USA.

<sup>34</sup> Centro Nacional de Investigaciones Cardiovasculares (CNIC), Madrid, Spain

<sup>35</sup> IMDEA Food Institute, CEI UAM + CSIC, Madrid, Spain

<sup>36</sup> Division of General Internal Medicine, Massachusetts General Hospital, Boston, MA, USA

<sup>37</sup> Department of Medicine, Harvard Medical School, Boston, MA, USA

<sup>38</sup> Department of Epidemiology, Harvard T. H. Chan School of Public Health, Harvard Medical School, Boston, MA, USA

<sup>39</sup> Department of Biostatistics, Harvard T. H. Chan School of Public Health, Harvard Medical School, Boston, MA, USA

<sup>40</sup> University of Tartu, Estonian Genome Center, Tartu, Estonia

<sup>41</sup> Research Centre for Prevention and Health, Capital Region of Denmark, Glostrup University Hospital, Glostrup, Denmark

<sup>42</sup> Institute of Public Health, Copenhagen University, Copenhagen, Denmark

<sup>43</sup> Friedman School of Nutrition Science and Policy, Tufts University, Boston, MA, USA

<sup>44</sup> Department of Public Health, Faculty of Health and Medical Sciences, University of Copenhagen, Copenhagen, Denmark

<sup>45</sup> Department of Epidemiology, Johns Hopkins Bloomberg School of Public Health, Baltimore, MD, USA

<sup>46</sup> National Heart, Lung, and Blood Institute's Framingham Heart Study, Framingham, MA, USA

<sup>47</sup> Division of Genetics, Brigham and Women's Hospital and Harvard Medical School, Boston, MA, USA
